# Supplementary material
Source: PubMed Central journal article supplement (PMC4631394)

## **ONLINE RESOURCES**

ONLINE RESOURCE FIG 1: Consort Figure for Randomized Clinical Trial

ONLINE RESOURCE FIG 2 Comparison of Analysis for Primary Outcome Variable for Intent to Treat and Completers Groups

ONLINE RESOURCE FIG 2 Interaction between Treatment and Attention/Concentration Score at Baseline vs. Change from Baseline in BADDS Attention/Concentration Subscale

ONLINE RESOURCE FIG 2

LEGEND: Individuals with baseline BADDS Attention/Concentration subscale score of greater than 10 were significantly more likely to experience a reduction in severity of reported attention/concentration difficulties than those participants with a subscale score of less than 10 at baseline.

ONLINE RESOURCE FIG 3:

Interaction Between Treatment and Pittsburgh Sleep Quality Index Score (PSQI) at Baseline vs. Change from Baseline in PSQI

ONLINE RESOURCE FIG 3

LEGEND: Individuals with a baseline PSQI score of  $>6$  were more likely to experience a greater improvement in sleep quality with active versus placebo treatment.

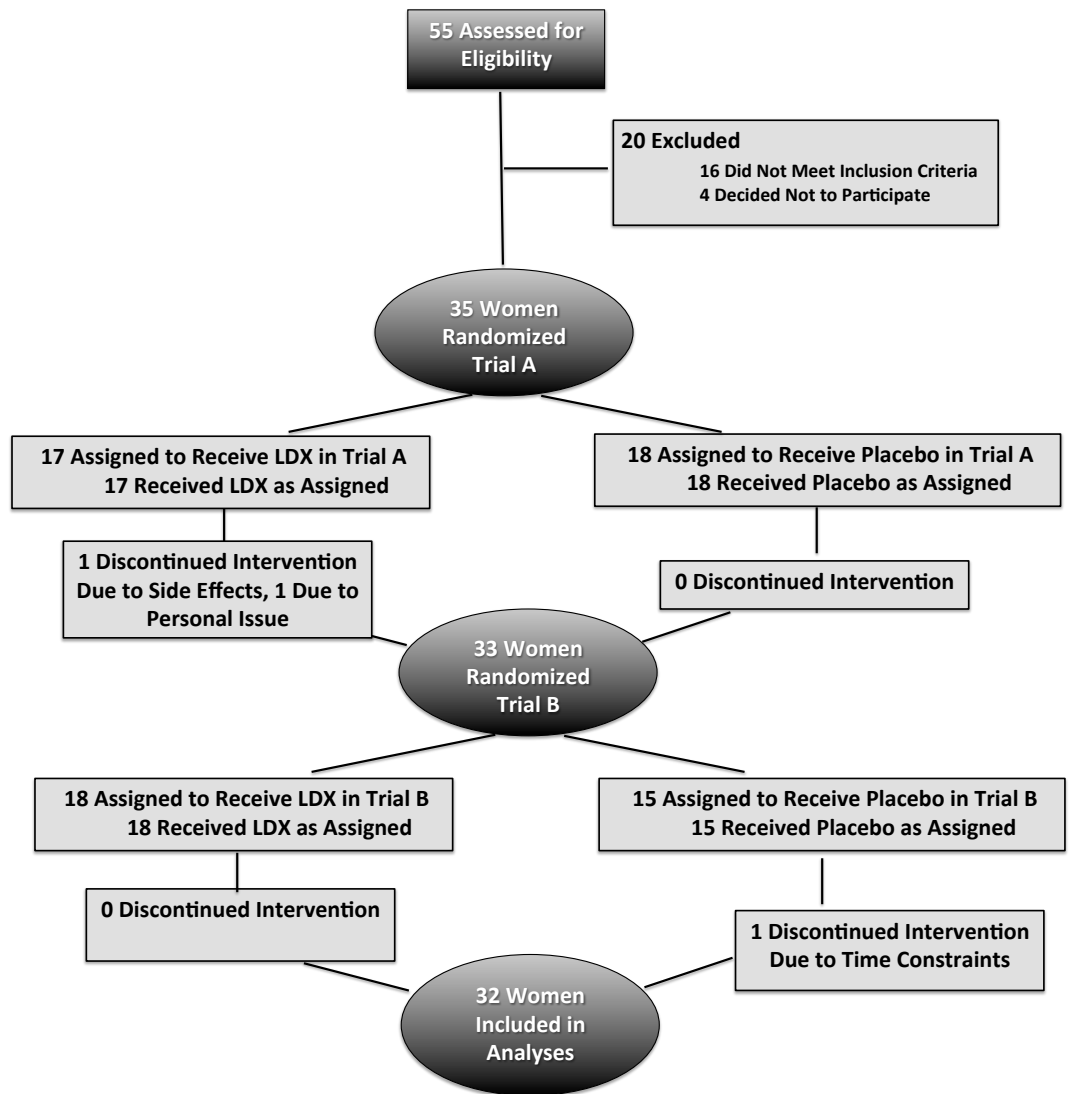

**Supplemental Materials Table 1: Comparison of Analyses for Primary Outcome Variable for Intent to Treat (ITT) and Completers**

| <b>Outcome Measure</b>                        | <b>ITT Analysis</b>                          |                     | <b>Completers Analysis</b>                   |                     |
|-----------------------------------------------|----------------------------------------------|---------------------|----------------------------------------------|---------------------|
|                                               | Mean Difference in Rank Score Between Groups | Main Effect p-value | Mean Difference in Rank Score Between Groups | Main Effect p-value |
| <b>BADDS Total Score</b>                      | <b>-13.0</b>                                 | <b>0.0001</b>       | <b>-12.7</b>                                 | <b>0.0001</b>       |
| <b>BADDS Subscale Scores</b>                  |                                              |                     |                                              |                     |
| <i>Organization &amp; Activation for Work</i> | -7.9                                         | 0.0021              | -7.1                                         | 0.0032              |
| <i>Attention and Concentration</i>            | -12.0                                        | 0.0008              | -11.5                                        | 0.0007              |
| <i>Alertness, Effort and Processing Speed</i> | -7.7                                         | 0.0253              | -9.5                                         | 0.0010              |
| <i>Managing Affective Interference</i>        | -6.0                                         | 0.0677              | -5.0                                         | 0.1110              |
| <i>Working Memory and Accessing Recall</i>    | -11.8                                        | 0.0004              | -11.4                                        | 0.0004              |

Interaction between Treatment and Attention/Concentration Score at Baseline  
vs. Change from Baseline in BADDs Attention/Concentration Subscale

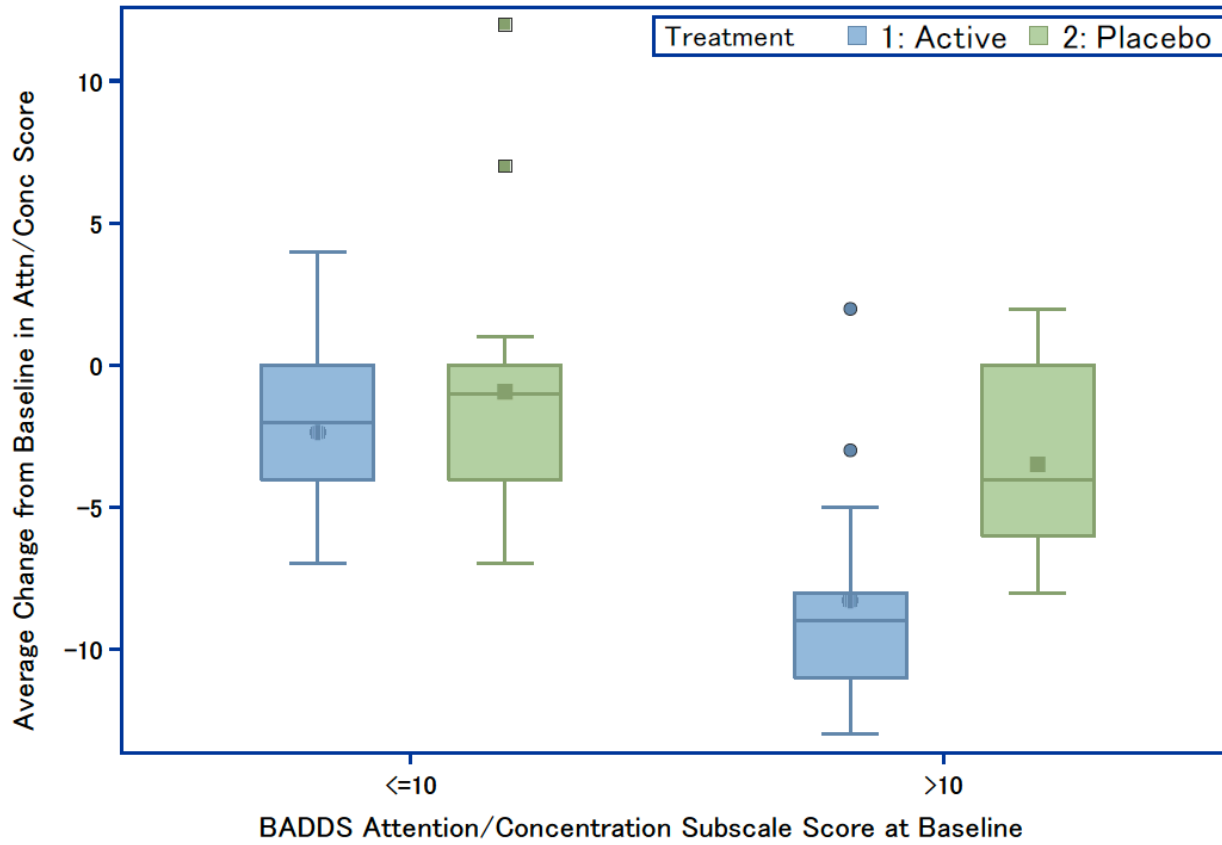

Interaction between Treatment and PSQI Score at Baseline  
vs. Change from Baseline in PSQI Score

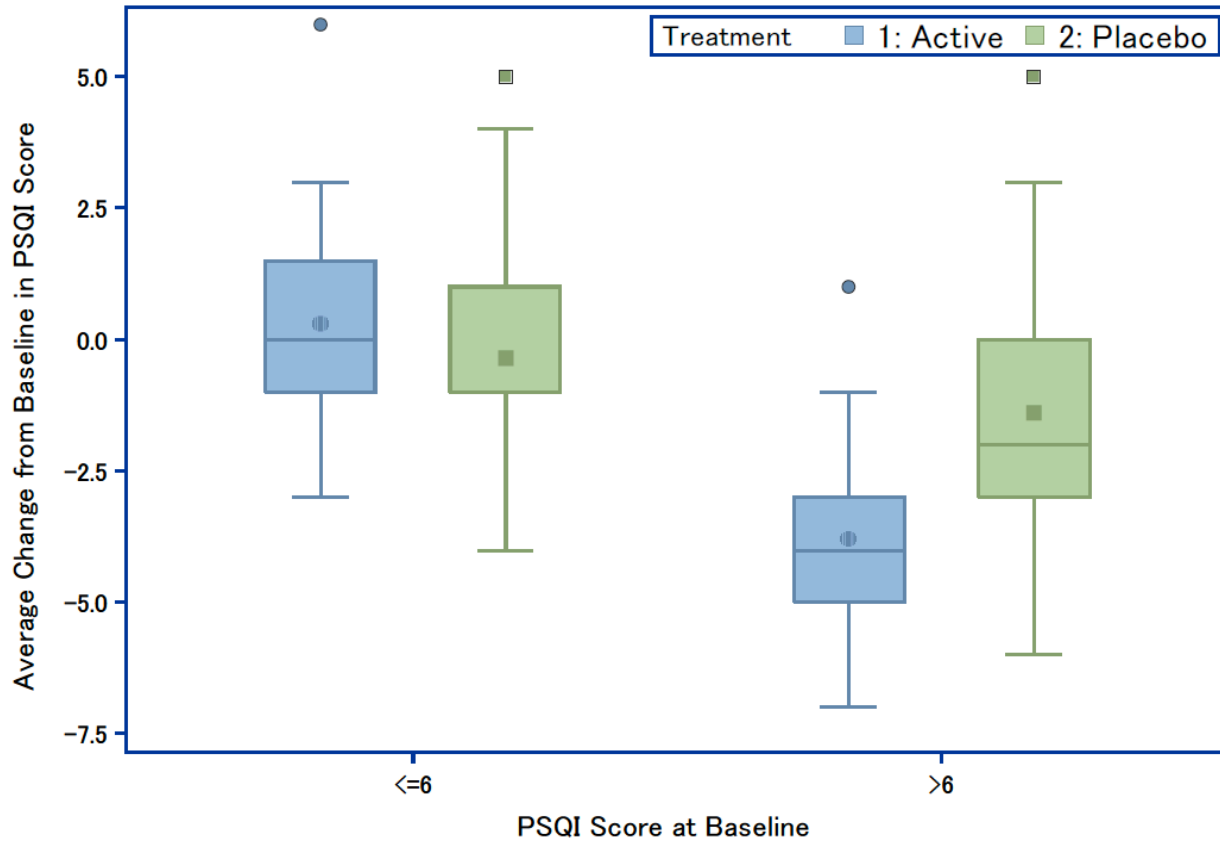

Supplement: NIHMS728488-supplement-SUPPLEMENTAL_MATERIALS.pdf [file NIHMS728488-supplement-SUPPLEMENTAL_MATERIALS.pdf]
